# Supplementary material for: Micosis en gatos: la temida "tiña".
Source: Royal Society of Chemistry journal article supplement (doi:10.1039/c8nr02492h), 2005-01-01
Supplement: c8nr02492h1.pdf [file c8nr02492h1.pdf]

## Reactive Template-Induced Core-Shell FeCo@C Microspheres as Multifunctional Electrocatalysts for Rechargeable Zinc-Air Batteries

Yanting Xu <sup>1,†</sup>, Binling Chen <sup>1,‡</sup>, Jun Nie, and Guiping Ma <sup>\*,†</sup>

<sup>†</sup>State Key Laboratory of Chemical Resource Engineering, Key Laboratory of Carbon Fiber and Functional Polymers, Beijing University of Chemical Technology

<sup>‡</sup>College of Engineering, Mathematics and Physical Sciences, University of Exeter, Exeter, EX4 4QF, UK

### Corresponding Author

\*E-mail: [magp@mail.buct.edu.cn](mailto:magp@mail.buct.edu.cn)

KEYWORDS: Core-shell, Fe-Co phosphide nanoparticles, Heteroatom-doped carbon, Electrocatalysts, Zn-air battery

### Experimental Section

#### 1. Synthesis

The mesoporous Fe<sub>3</sub>O<sub>4</sub> microspheres were prepared via a solvothermal method according to a previous report.<sup>S1</sup> Typically, FeCl<sub>3</sub>•6H<sub>2</sub>O (1.35 g) and NaAc (2.16 g) were dissolved in EG (33 ml) with magnetic stirring, followed by the addition of Na<sub>3</sub>Cit (0.42 g) with continued vigorously stirring about 40 min. Then the homogeneous yellow solution was transferred into a Teflon-lined stainless-steel autoclave (50 ml capacity). The autoclave was heated to and kept at 200 °C for 8 h, and was cooled to room temperature naturally. The obtained precipitates were washed with absolute ethanol several times and then dried in a vacuum at 60 °C for 12 h.

#### Preparation of Fe<sub>3</sub>O<sub>4</sub>@PZS

The above synthesized Fe<sub>3</sub>O<sub>4</sub> (0.06 g) were dispersed in 30 mL acetonitrile under ultrasound (50 Hz) for ten minutes to obtain a homogeneous suspension. Then 20 mL of acetonitrile containing 0.01 g of hexachlorocyclophosphazene and 0.05 g of 4,4'-sulfonyldiphenol was added into the above suspension. After ultrasound for ten minutes, trimethylamine (0.5 mL) was added to initialize the polymerization and the mixture was

ultrasounded continuously for another 3 h. When the reaction time was reached, the precipitates were collected and washed with ethanol for three times and dried in the oven under vacuum at 60 °C for 12 h. The obtained product was denoted as Fe<sub>3</sub>O<sub>4</sub>@PZS. The preparation of PZS was similar to the above process without the addition of Fe<sub>3</sub>O<sub>4</sub>.

#### **Preparation of Fe<sub>3</sub>O<sub>4</sub>@PZS@ZIF-67**

The Fe<sub>3</sub>O<sub>4</sub>@PZS@ZIF-67 was prepared by in situ growth method.<sup>S2</sup> The as-prepared Fe<sub>3</sub>O<sub>4</sub>@PZS (0.03 g) microspheres were dispersed into 10 mL of Co(NO<sub>3</sub>)<sub>2</sub>•6H<sub>2</sub>O (1 mM) methanol solution under ultrasound for 30 minutes and then the mixture was put in the oven under vacuum at 80 °C overnight to make the solvent evaporate absolutely. Then 10 mL of 2-MeIM (5 mM) methanol solution was added to the dried mixture and kept for 10 minutes at room temperature. Finally, the samples were separated by a permanent magnet, washed with absolute ethanol and dried under vacuum at 80 °C for 12 h. The sample was named Fe<sub>3</sub>O<sub>4</sub>@PZS@ZIF-67. The preparation of PZS@ZIF-67 and Fe<sub>3</sub>O<sub>4</sub>@ZIF-67 was similar to the above process.

#### **Preparation of FeCo@C MS**

The above obtained Fe<sub>3</sub>O<sub>4</sub>@PZS@ZIF-67 product was carbonized at 850°C with heating rate of 2 °C/min for 2 h in a tubular furnace under N<sub>2</sub> atmosphere. 10 mg of the obtained Fe<sub>3</sub>O<sub>4</sub>/Co-NPS was pre-leached in 10 mL 2 M HCl at 80°C for 12 h and washed thoroughly with deionized water and ethanol and dried under vacuum at room temperature for 12 h. The acid etched product was denoted as Fe/Co-NPS and carbonized at 850°C with heating rate of 2 °C/min for 2 h in a tubular furnace under N<sub>2</sub> atmosphere to get FeCo@C MS.

The preparation of Fe-NPS, Fe/Co-N, Co-NPS from Fe<sub>3</sub>O<sub>4</sub>@PZS, Fe<sub>3</sub>O<sub>4</sub>@ZIF-67, PZS@ZIF-67 was similar to the above process.

#### **Preparation of Fe<sub>3</sub>O<sub>4</sub>-850**

The prepared  $\text{Fe}_3\text{O}_4$  was carbonized at  $850^\circ\text{C}$  with heating rate of  $2^\circ\text{C}/\text{min}$  for 2 h in a tubular furnace under  $\text{N}_2$  atmosphere. The obtained sample was denoted as  $\text{Fe}_3\text{O}_4\text{-850}$ .

### **Preparation of $\text{Fe}_3\text{O}_4@\text{NPS}$**

The prepared  $\text{Fe}_3\text{O}_4@\text{PZS}$  was carbonized at  $850^\circ\text{C}$  with heating rate of  $2^\circ\text{C}/\text{min}$  for 2 h in a tubular furnace under  $\text{N}_2$  atmosphere. The obtained sample was denoted as  $\text{Fe}_3\text{O}_4@\text{NPS}$ .

## **2. Characterizations**

Microscopic features of the above prepared samples were characterised by transmission electron microscope (TEM, Tecnai G<sup>2</sup> T20, FEI, USA) and high-resolution transmission electron microscope (HRTEM, JEM 3010, JEOL, Japan). Attenuated total reflectance-Fourier transform infrared (ATR-FTIR) spectra were collected using a spectrometer (Nicolet-is5 IR, Thermo Fisher Scientific, USA). The crystal structure was evaluated on a powder X-ray diffraction (XRD, D8 Advance, Bruker, Germany) system with  $\text{Cu K}\alpha$  radiation. The surface chemical composition of the microspheres was analyzed by X-ray photoelectric spectroscopy (XPS, ESCALAB 250, Thermo VG Scientific, USA). Nitrogen absorption/desorption isotherms were obtained on a analyzer (3H-2000PS1, Beishide Instrument Company) at 77 K and the corresponding surface areas were determined using the Brunauer-Emmett-Teller (BET) method. Energy dispersive X-ray spectroscopy (EDS, S-3200N, Hitachi, Japan) was performed to measure the composition of the samples at 1 KV. The internal structure and graphitic structure were also investigated by a Raman microscopy system (Invia Reflex, Renishaw, British). The Zn-air battery performance was performed by LAND CT2001A.

## **3. Electrocatalytic evaluation**

The electrochemical tests were performed in a standard three-electrode system controlled by a CHI 760E electrochemistry workstation. Catalyst powders coated on glassy carbon (GC, 5 mm diameter) and RRDE (5 mm diameter) were used as working electrode, platinum slice as counter electrode and saturated calomel electrode as reference electrode. All the potentials

of HER and OER in this work were *iR*-corrected, and all the potentials (vs SCE) were converted to the RHE scale using the Nernst equation ( $E_{\text{RHE}} = E_{\text{SCE}} + 0.244 + 0.0591 \text{ pH}$ ). The GC and RRDE electrodes were polished with alumina slurries and subsequently washed with ultrapure water and ethanol.

### **Preparation of working electrode**

All prepared catalysts (5 mg) were ultrasonically dispersed in the mixture of ethanol (1 mL) and 5% Nafion (100  $\mu\text{L}$ ) to form catalyst ink, respectively. And a 10  $\mu\text{L}$  (for GC) or 5  $\mu\text{L}$  (for RRDE) of the catalyst ink was dropped onto the polished electrode and dried at room temperature. The 20 wt% Pt/C catalyst was also coated on the GC or RRDE electrode in the same way as a benchmark for the electrochemical activity.

### **ORR and OER activity tests**

ORR activity measurements were carried out at room temperature both in 0.10 M KOH solution and 0.5 M  $\text{H}_2\text{SO}_4$  solution. OER activity tests were carried out in 0.10 M KOH solution. Before test, a  $\text{O}_2$  flow was used for the electrolyte for 30 min to give a saturation state. Cyclic voltammetry for ORR was carried out in  $\text{O}_2$ -saturated 0.1 M KOH from 0.21 V to 0.11 V and  $\text{O}_2$ -saturated 0.5 M  $\text{H}_2\text{SO}_4$  from 0 V to 1.2 V at a scan rate of 50  $\text{mV s}^{-1}$ . Cyclic voltammetry for OER was carried out in  $\text{O}_2$ -saturated 0.1 M KOH from 1.0 V to 2.1 V. Linear sweep voltammograms (LSV) measurements for ORR were performed at different rotating speeds from 400 to 2500 rpm in  $\text{O}_2$ -saturated 0.1 M KOH from 0 V to 1.2 V and  $\text{O}_2$ -saturated 0.5 M  $\text{H}_2\text{SO}_4$  from 0 V to 1.2 V at a sweep rate of 10  $\text{mV s}^{-1}$ . LSV measurements for OER were performed in  $\text{O}_2$ -saturated 0.1 M KOH from 1.0 V to 2.1 V with a rotation speed of 1600 rpm. The RRDE was used in 0.10 M KOH solution and the GC was used in 0.5 M  $\text{H}_2\text{SO}_4$  solution as the substrate for the working electrode.

The number of electrons transferred onto the catalyst was calculated according to the Koutecky-Levich equation:

$$\frac{1}{j} = \frac{1}{j_D} + \frac{1}{j_K} = \frac{1}{(B\omega^{1/2})} + \frac{1}{j_K}$$

$$B = 0.2nFC_0D_0^{2/3}\nu^{-1/6}$$

where  $j$  (mA cm<sup>-2</sup>) is the measured current density, which is related to the diffusion-limiting current ( $j_d$ ) and the kinetic current ( $j_k$ ),  $F$  is the Faraday constant (96485 C mol<sup>-1</sup>),  $D_0$  is the diffusion coefficient of oxygen in 0.1 M KOH ( $1.9 \times 10^{-5}$  cm<sup>2</sup> s<sup>-1</sup>),  $\nu$  is the kinematic viscosity of water (0.01 cm<sup>2</sup> s<sup>-1</sup>),  $C_0$  is the bulk concentration of oxygen in oxygen-saturated 0.1 M KOH ( $1.2 \times 10^{-6}$  mol cm<sup>-3</sup>),  $\omega$  is the rotation rate, and  $n$  is the electron transfer number for the ORR. A linear plot of  $j_{lim}^{-1}$  versus  $\omega^{-1/2}$  has a slope of  $1/(0.2nFC_0D_0^{2/3}\nu^{-1/6})$ .

The four-electron selectivity of catalysts was evaluated based on the H<sub>2</sub>O<sub>2</sub> yield, calculated from the following equation:

$$H_2O_2(\%) = 200 \times \frac{I_R/N}{(I_R/N) + I_D}$$

The electron transfer number can be calculated from the following equation:

$$n = 4 \times \frac{I_D}{(I_R/N) + I_D}$$

Here,  $I_D$  and  $I_R$  are the disk and ring currents, respectively, and  $N = 0.37$  is the ring collection efficiency. Chronoamperometric measurements were performed at a static cathodic potential (0.71 V) and an electrode rotation speed of 1600 rpm in O<sub>2</sub>-saturated 0.10 M KOH solution to investigate stability and possible poisoning effect of the catalysts.

### HER activity tests

To evaluate HER activity, the electrochemical tests were performed in 0.5 M H<sub>2</sub>SO<sub>4</sub> solution which were purged with high purity nitrogen gas for at least 30 mins before measurement. Catalyst powders coated on GC were used as working electrode and the

electrode was constantly rotating at 1600 rpm to get rid of the bubbles during measurement. Linear sweep voltammetry was carried out at the scan rate of  $5 \text{ mV s}^{-1}$ . Electrochemical impedance spectroscopy was measured at the overpotential of 0.2 V in the frequency range of  $10^5$ - $10^{-2}$  Hz with the amplitude potential of 5 mV. The stability of prepared catalyst was evaluated by chronopotentiometry at  $10 \text{ mA cm}^{-2}$ .

#### **4. Zn-air Battery Performance**

The rechargeable Zn-air battery performance was measured using a liquid Zn-air battery with catalysts on carbon paper as the cathode, a polished Zn plate (0.3 mm of thickness) as anode, and 6 M KOH solution as the electrolyte for both primary and rechargeable Zn-air batteries.<sup>S3,4</sup> Typically, 100  $\mu\text{L}$  catalyst ink was dropped onto carbon paper and dried naturally to form a uniform catalyst layer, resulting a mass loading of  $1.2 \text{ mg cm}^{-2}$ . For comparison, the performance of the Zn-air battery containing 20 wt% Pt/C and  $\text{RuO}_2$  (20 wt% Pt/C +  $\text{RuO}_2$ ) with the mass ratio of 1:1 was also tested under similar conditions. The battery test was performed in room environment on LAND CT2001A.

## Supporting Figures

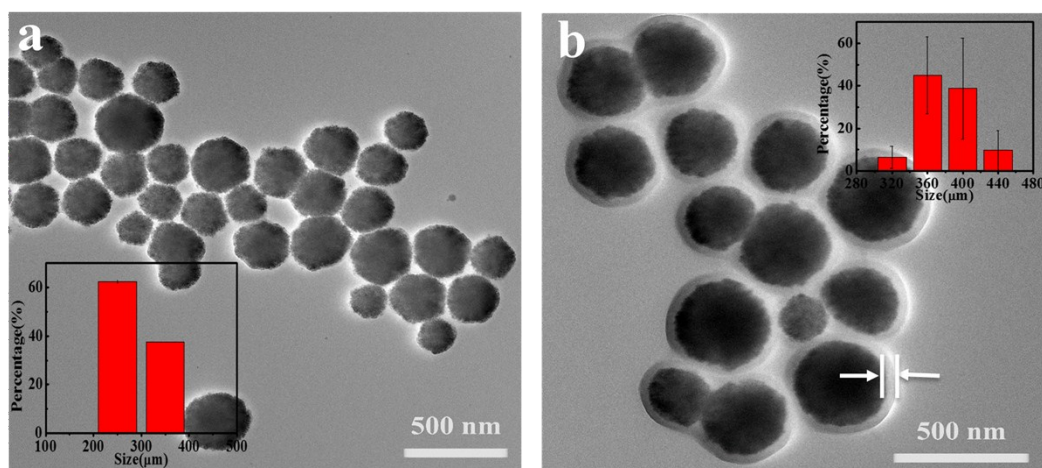

**Figure S1.** TEM images of (a) Fe<sub>3</sub>O<sub>4</sub> and (b) Fe<sub>3</sub>O<sub>4</sub>@PZS.

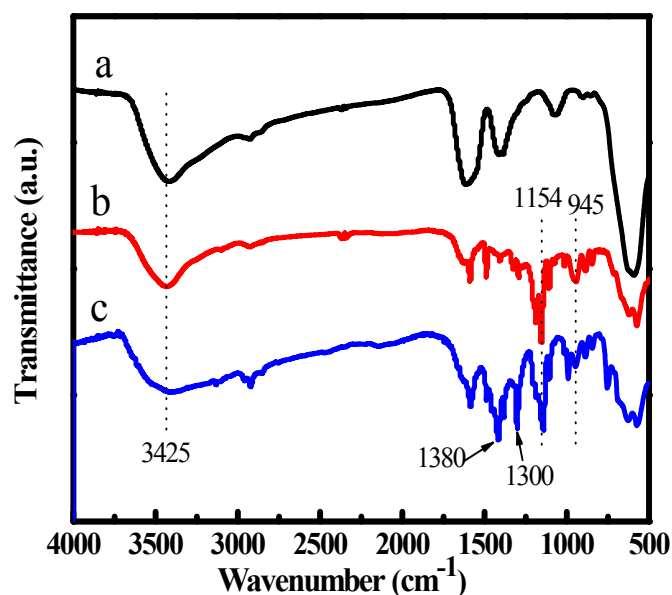

**Figure S2.** FT-IR spectra of (a)  $\text{Fe}_3\text{O}_4$ , (b)  $\text{Fe}_3\text{O}_4@\text{PZS}$  and (c)  $\text{Fe}_3\text{O}_4@\text{PZS}@\text{ZIF-67}$ .

To prove the formation of core-shell and core-double shell structure, the FT-IR detection was conducted. As can be seen in Figure S2a, the absorption peak at around  $580\text{ cm}^{-1}$  was the characteristic peak for Fe-O. The peak at  $3425\text{ cm}^{-1}$  was the stretching vibration of -OH on the surface of  $\text{Fe}_3\text{O}_4$ . New peaks centred at  $945$  and  $1154\text{ cm}^{-1}$  appeared in Figure S2b, which can be assigned to the new produced P-O-(Ph) and S=O in BPS respectively. The peaks at  $525$  and  $607\text{ cm}^{-1}$  were the characteristic peaks for P-Cl in HCCP. Therefore, it can be concluded that the PZS shell was coated on the surface of  $\text{Fe}_3\text{O}_4$  core. As shown in Figure S2c, the new strong peaks at  $1300$  and  $1380\text{ cm}^{-1}$  can be attributed to the C-N and -CH<sub>3</sub> in 2-Methylimidazole, which proved that ZIF-67 was grown on the surface of  $\text{Fe}_3\text{O}_4@\text{PZS}$ .



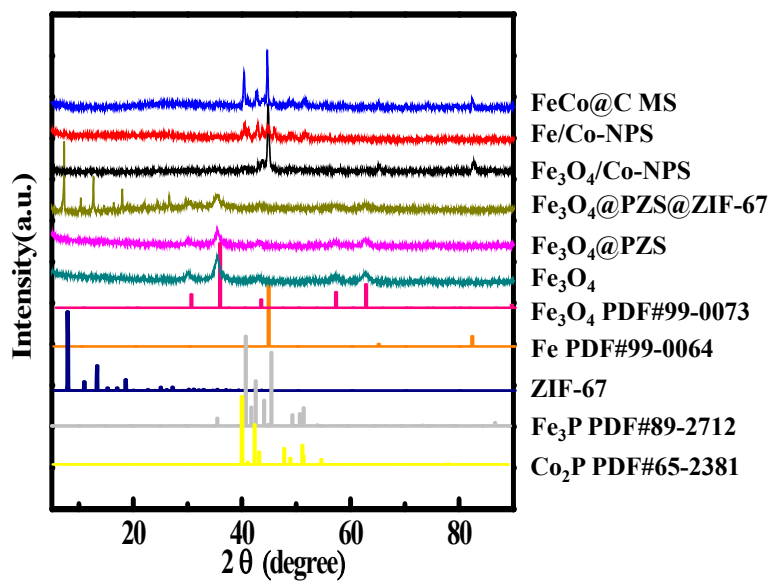

Figure S3. XRD patterns of samples obtained.

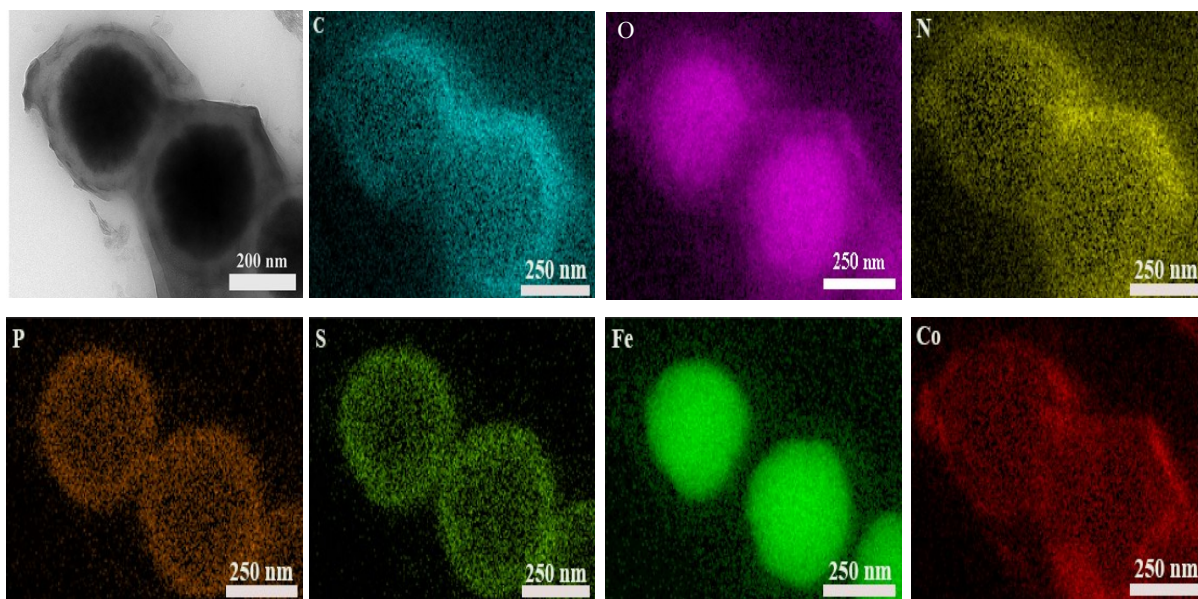

**Figure S4.** Compositional EDS mapping of  $\text{Fe}_3\text{O}_4@\text{PZS}@\text{ZIF-67}$  using scanning transmission electron microscopy.

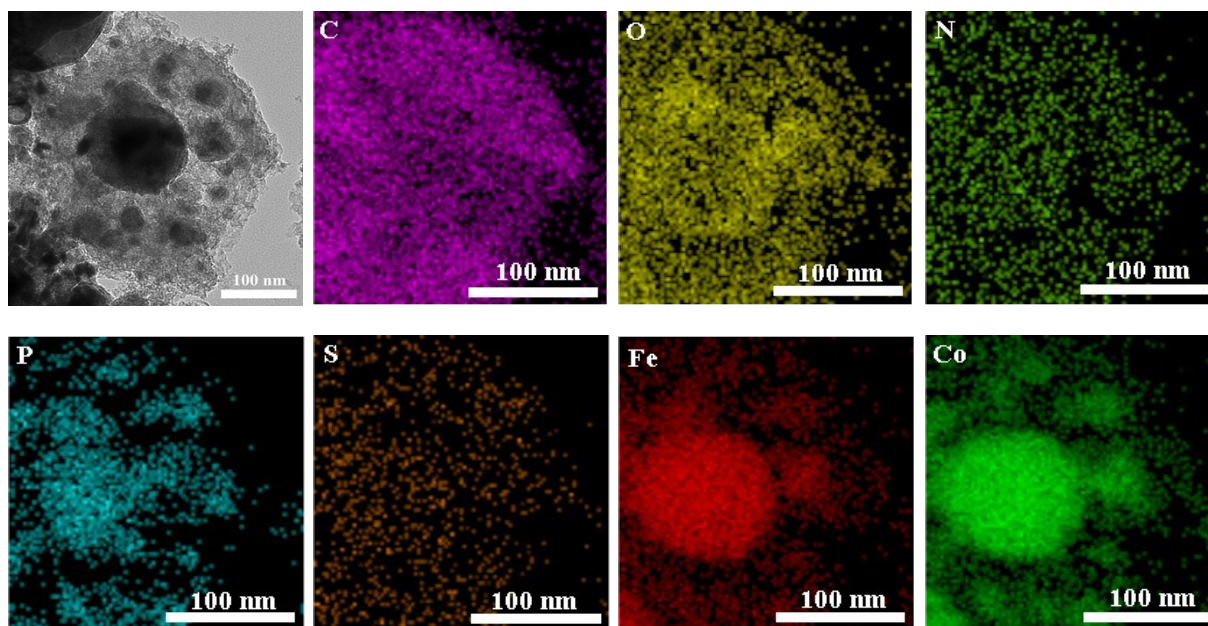

**Figure S5.** Compositional EDS mapping of  $\text{Fe}_3\text{O}_4/\text{Co-NPS}$  using scanning transmission electron microscopy.

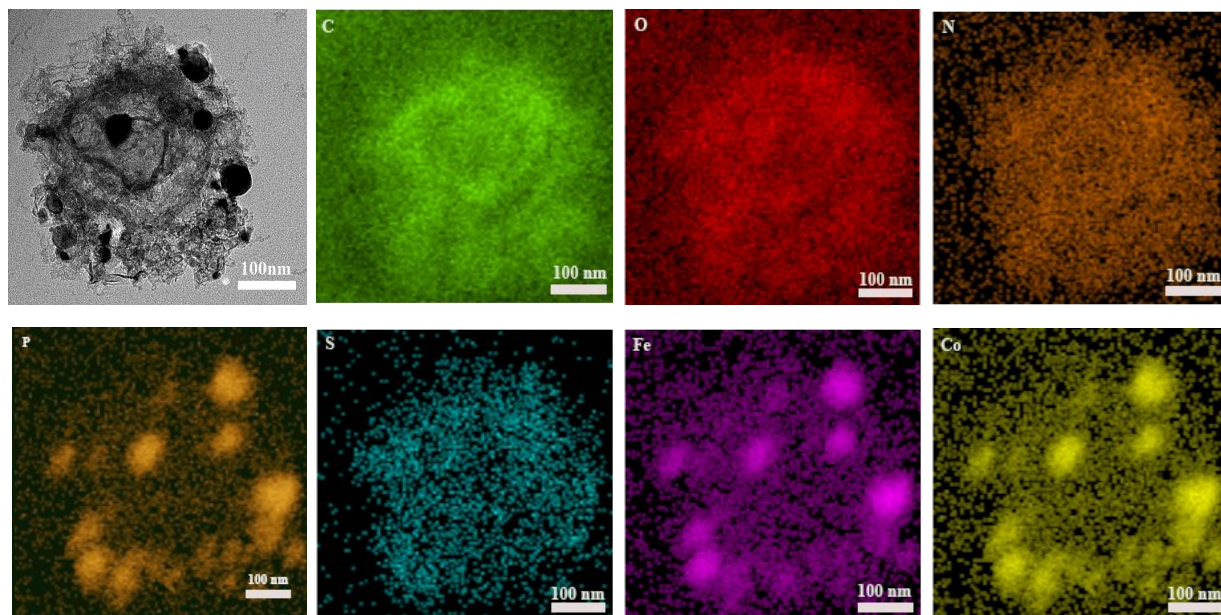

**Figure S6.** Compositional EDS mapping of Fe/Co-NPS using scanning transmission electron microscopy.

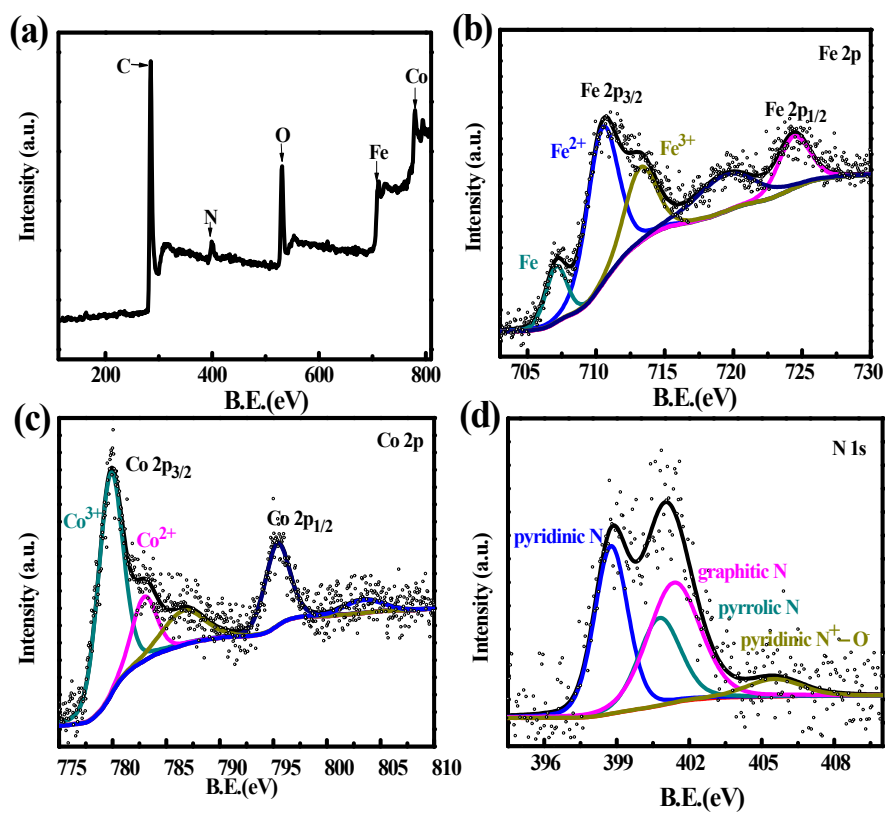

**Figure S7.** (a) Full spectrum and high-resolution XPS spectra of (b) Fe 2p, (c) Co 2p, and (d) N 1s of Fe<sub>3</sub>O<sub>4</sub>/Co-NPS.

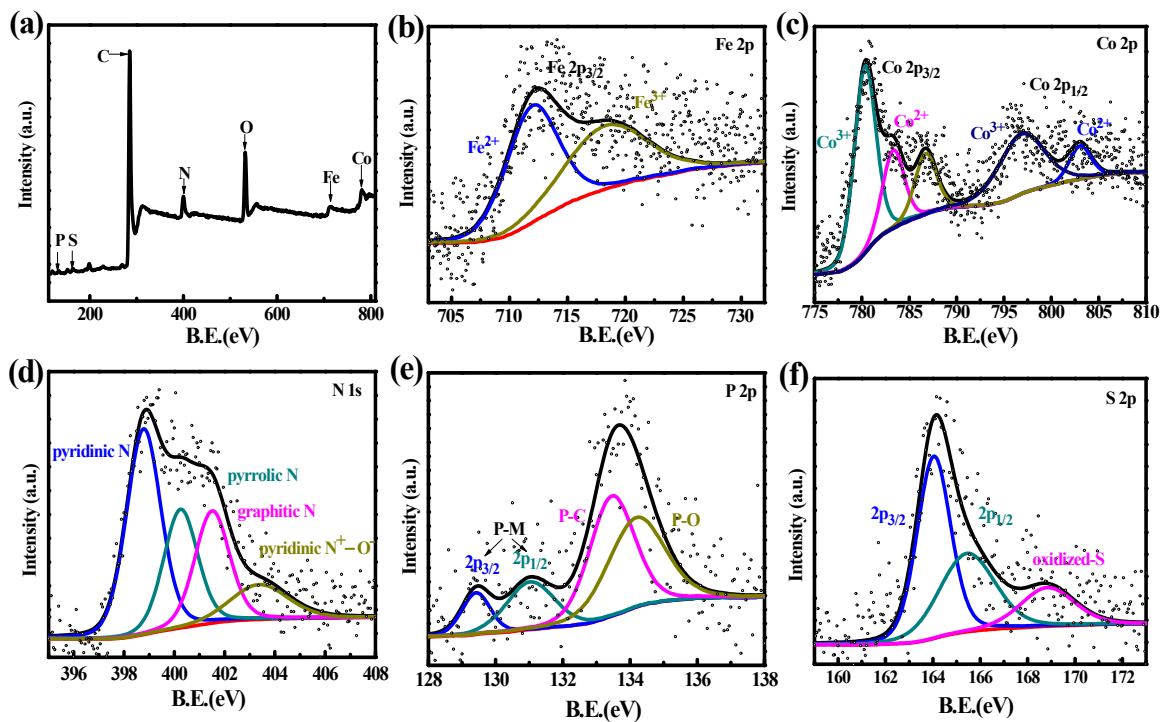

**Figure S8.** (a) Full spectrum and high-resolution XPS spectra of (b) Fe 2p, (c) Co 2p, (d) N 1s, (e) P 2p, and (f) S 2p of Fe/Co-NPS.

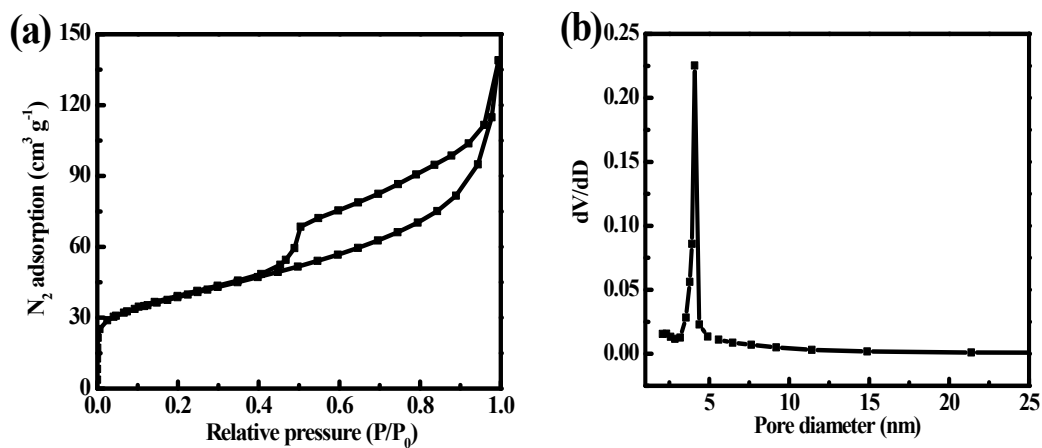

**Figure S9.** (a) Nitrogen adsorption-desorption isotherms of Fe<sub>3</sub>O<sub>4</sub>/Co-NPS, and (b) its corresponding pore-size distribution.

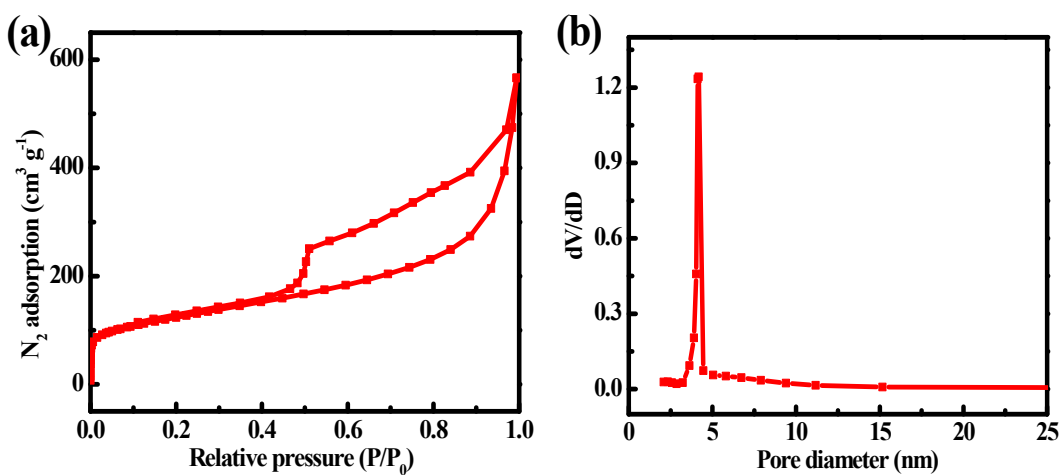

**Figure S10.** (a) Nitrogen adsorption-desorption isotherms of Fe/Co-NPS, and (b) its corresponding pore-size distribution.

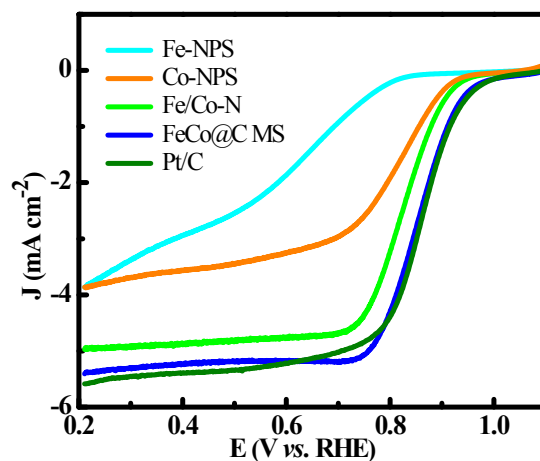

**Figure S11.** LSV plots of Fe-NPS, Fe/Co-N, Co-NPS, FeCo@C MS and Pt/C at a scan rate of  $10 \text{ mV s}^{-1}$  with a rotation speed of 1600 rpm in  $\text{O}_2$ -saturated 0.1 M KOH.

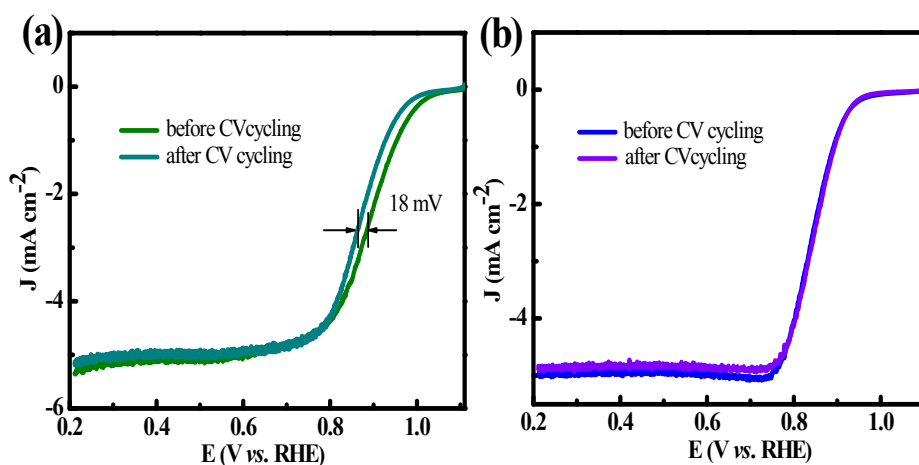

**Figure S12.** ORR LSV curves of (a) Pt/C and (b) FeCo@C MS before and after CV cycling for 1000 cycles at  $50 \text{ mV s}^{-1}$  within the potential range from 0.21 to 1.1 V.

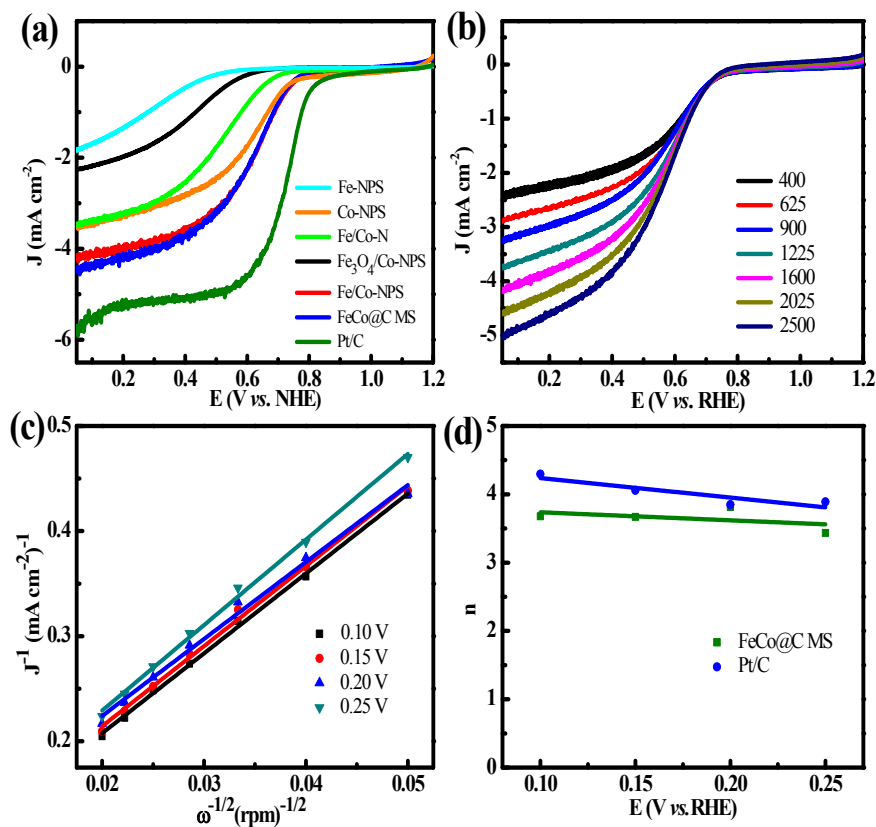

**Figure S13.** Electrochemical evaluation of Fe<sub>3</sub>O<sub>4</sub>/Co-NPS, Fe/Co-NPS, FeCo@C MS and commercial Pt/C catalysts in O<sub>2</sub>-saturated 0.5 M H<sub>2</sub>SO<sub>4</sub>. (a) RRDE polarization plots of Fe<sub>3</sub>O<sub>4</sub>/Co-NPS, Fe/Co-NPS, FeCo@C MS and commercial Pt/C catalysts at a scan rate of 10 mV s<sup>-1</sup> with a rotation speed of 1600 rpm. (b) Voltammograms of FeCo@C MS at various speeds at a scan rate of 10 mV s<sup>-1</sup>. (c) Corresponding Koutecky-Levich plots at different potentials. (d) Electron transfer number of FeCo@C MS and commercial Pt/C.



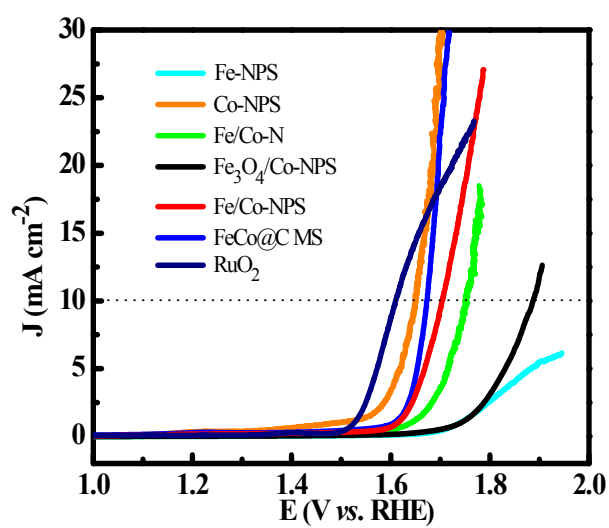

**Figure S14.** Polarization plots for OER of  $\text{Fe}_3\text{O}_4/\text{Co-NPS}$ , Fe/Co-NPS and FeCo@CMS catalysts at a scan rate of  $10 \text{ mV s}^{-1}$  with a rotation speed of 1600 rpm in  $\text{O}_2$ -saturated 0.1 M KOH.

**Table S1.** Textural properties of Fe<sub>3</sub>O<sub>4</sub>/Co-NPS, Fe/Co-NPS and FeCo@C MS.

| Catalyst                               | BET specific surface area (m <sup>2</sup> /g) | Pore volume (cm <sup>3</sup> /g) | Pore diameter (nm) |
|----------------------------------------|-----------------------------------------------|----------------------------------|--------------------|
| Fe <sub>3</sub> O <sub>4</sub> /Co-NPS | 133.4                                         | 0.2                              | 4.1                |
| Fe/Co-NPS                              | 428.9                                         | 0.9                              | 4.2                |
| FeCo@C MS                              | 465.8                                         | 1.2                              | 4.1                |

**Table S2.** Summary of ORR performance of recently reported core-shell catalysts.

| Catalyst                                                | E <sub>0</sub> (V vs.RHE) | E <sub>1/2</sub> (V vs.RHE) | Condition | Reference |
|---------------------------------------------------------|---------------------------|-----------------------------|-----------|-----------|
| Pt/C                                                    | 1.02                      | 0.86                        | 0.1 M KOH | This work |
| FeCo@C MS                                               | 1.04                      | 0.85                        | 0.1 M KOH | This work |
| CoOx@NC                                                 | 0.91                      | 0.72                        | 0.1 M KOH | S5        |
| CoOx@C                                                  | 0.75                      | 0.68                        | 0.1 M KOH | S5        |
| CoS NWs@NSC-2                                           | 0.93                      | 0.84                        | 0.1 M KOH | S6        |
| CNF@Zn/CoNC                                             | 0.91                      | 0.82                        | 0.1 M KOH | S7        |
| CNF@CoNC                                                | 0.89                      | 0.81                        | 0.1 M KOH | S7        |
| CNF@ZnNC                                                | 0.87                      | 0.78                        | 0.1 M KOH | S7        |
| F <sub>0.2</sub> N <sub>0.2</sub> M <sub>0.2</sub> -900 | 0.97                      | 0.87                        | 0.1 M KOH | S8        |
| Co@CoOx/NCNTs                                           | 0.94                      | 0.80                        | 0.1 M KOH | S9        |
| Fe@C-NG/NCNTs                                           | 0.93                      | 0.84                        | 0.1 M KOH | S10       |
| CoZn-NC-700                                             | 0.98                      | 0.84                        | 0.1 M KOH | S3        |
| Fe-Phen-N-800                                           | 0.99                      | 0.86                        | 0.1 M KOH | S11       |

**Table S3.** Summary of OER performance of recently reported catalysts which have core-shell structures.

| Catalyst                                                | $E_0$<br>(V vs.RHE) | Overpotential<br>at 10 mA cm <sup>-2</sup><br>(V vs.RHE) | Condition | Reference |
|---------------------------------------------------------|---------------------|----------------------------------------------------------|-----------|-----------|
| RuO <sub>2</sub>                                        | 1.48                | 0.38                                                     | 0.1 M KOH | This work |
| FeCo@C MS                                               | 1.53                | 0.44                                                     | 0.1 M KOH | This work |
| CoOx@NC                                                 | 1.41                | 0.35                                                     | 0.1 M KOH | S5        |
| CoOx@C                                                  | 1.53                | 0.39                                                     | 0.1 M KOH | S5        |
| CNF@Zn/CoNC                                             | 1.52                | 0.47                                                     | 0.1 M KOH | S7        |
| CNF@CoNC                                                | 1.53                | 0.48                                                     | 0.1 M KOH | S7        |
| CNF@ZnNC                                                | 1.42                | 0.55                                                     | 0.1 M KOH | S7        |
| F <sub>0.2</sub> N <sub>0.2</sub> M <sub>0.2</sub> -900 | 1.21                | 0.42                                                     | 0.1 M KOH | S8        |
| Fe@C-NG/NCNTs                                           | 1.42                | 0.45                                                     | 1 M KOH   | S10       |
| CoZn-NC-700                                             | 1.52                | 0.39                                                     | 0.1 M KOH | S3        |
| Ni/Fe <sub>3</sub> O <sub>4</sub> @ONC                  | 1.46                | 0.30                                                     | 0.1 M KOH | S12       |

**Table S4.** Summary of HER performance of recently reported catalysts which have core-shell structures.

| Catalyst                                         | Overpotential<br>at 10 mA cm <sup>-2</sup><br>(V vs. RHE) | Tafel slope<br>(mV dec <sup>-1</sup> ) | Condition                            | Reference |
|--------------------------------------------------|-----------------------------------------------------------|----------------------------------------|--------------------------------------|-----------|
| Pt/C                                             | 0.03                                                      | 29                                     | 0.5 M H <sub>2</sub> SO <sub>4</sub> | This work |
| FeCo@C MS                                        | 0.22                                                      | 65                                     | 0.5 M H <sub>2</sub> SO <sub>4</sub> | This work |
| Fe <sub>x</sub> P@NPC                            | 0.23                                                      | 81                                     | 0.5 M H <sub>2</sub> SO <sub>4</sub> | S13       |
| C <sub>3</sub> N <sub>4</sub> @NG                | 0.24                                                      | 52                                     | 0.5 M H <sub>2</sub> SO <sub>4</sub> | S14       |
| FeCo@NCNTs-NH                                    | 0.30                                                      | 74                                     | 0.5 M H <sub>2</sub> SO <sub>4</sub> | S15       |
| G-coated Cu NWs                                  | 0.25                                                      | 67                                     | 0.5 M H <sub>2</sub> SO <sub>4</sub> | S16       |
| MoS <sub>2</sub> /MoO <sub>3</sub> /FTO          | 0.31                                                      | 55                                     | 0.5 M H <sub>2</sub> SO <sub>4</sub> | S17       |
| MoO <sub>3</sub> /Ni <sub>3</sub> S <sub>2</sub> | 0.30                                                      | 57                                     | 0.5 M H <sub>2</sub> SO <sub>4</sub> | S18       |
| Ni-Sn@C                                          | 0.36                                                      | 35                                     | 0.5 M H <sub>2</sub> SO <sub>4</sub> | S19       |
| MoS <sub>2</sub> @MoO <sub>2</sub>               | 0.24                                                      | 76                                     | 0.5 M H <sub>2</sub> SO <sub>4</sub> | S20       |
| Fe/P/C0.5-800                                    | 0.26                                                      | 53.6                                   | 0.5 M H <sub>2</sub> SO <sub>4</sub> | S21       |

---

**References**

- (S1) Meng, F.; Wang, Z.; Zhong, H.; Wang, J.; Yan, J.; Zhang, X. Reactive multifunctional template-induced preparation of Fe-N-doped mesoporous carbon microspheres towards highly efficient electrocatalysts for oxygen reduction. *Adv. Mater.*, **2016**, *28*, 7948-7955.
- (S2) Niu, Q.; Guo, J.; Chen, B.; Nie, J.; Guo, X.; Ma, G. Bimetal-organic frameworks/polymer core-shell nanofibers derived heteroatom-doped carbon materials as electrocatalysts for oxygen reduction reaction. *Carbon*, **2017**, *114*, 250-260.
- (S3) Chen, B.; He, X.; Yin, F.; Wang, H.; Liu, D.; Shi, R.; Chen, J.; Yin, H. MO-Co@N doped Carbon (M = Zn or Co): Vital roles of inactive Zn and highly efficient activity toward oxygen reduction/evolution reactions for rechargeable Zn-air battery. *Adv. Funct. Mater.* **2017**, *27*, 1700795.
- (S4) Liu, J.; Jiang, L.; Tang, Q.; Wang, E.; Qi, L.; Wang, S.; Sun, G. Amide-functionalized carbon supports for cobalt oxide toward oxygen reduction reaction in Zn-air battery. *Appl. Catal. B-Environ.*, **2014**, *148*, 212-220.
- (S5) Hao, Y.; Xu, Y.; Han, N.; Liu, J.; Sun, X. Boosting the bifunctional electrocatalytic oxygen activities of coox nanoarrays with a porous N-doped carbon coating and their application in Zn-air batteries. *J. Mater. Chem. A*, **2017**, *5*, 17804-17810.
- (S6) Han, C.; Li, Q.; Wang, D.; Lu, Q.; Xing, Z.; Yang, X. Cobalt sulfide nanowires core encapsulated by a N,S-co-doped graphitic carbon shell for efficient oxygen reduction reaction. *Small*, **2018**, *14*, 1703642.
- (S7) Zhao, Y.; Lai, Q.; Zhu, J.; Zhong, J.; Tang, Z.; Luo, Y.; Liang, Y. Controllable construction of core-shell polymer@zeolitic Imidazolate frameworks fiber derived heteroatom doped carbon nanofiber network for efficient oxygenelectrocatalysis, *Small*, **2018**, *14*, e1704207.

- (S8) Yang, W.; Zhang, Y.; Liu, X.; Chen, L.; Jia, J. In situ formed Fe-N doped metal organic framework@carbon nanotubes/graphene hybrids for a rechargeable Zn-air battery. *Chem. Commun.*, **2017**, *53*, 12934-12937.
- (S9) Lin, C.; Shinde, S. S.; Jiang, Z.; Song, X.; Sun, Y.; Guo, L. In situ directional formation of Co@CoO<sub>x</sub>-embedded in 1D carbon nanotubes as an efficient oxygen electrocatalyst for ultra-high rate Zn-air batteries. *J. Mater. Chem. A*, **2017**, *5*, 13994-14002
- (S10) Lei, Y.; Wang, Q.; Chen, Z.; Wu, N.; Wang, Y.; Wang, B. Fe/Fe<sub>3</sub>C@C nanoparticles encapsulated in N-doped graphene-cnts framework as an efficient bifunctional oxygen electrocatalyst for robust rechargeable Zn-air batteries. *J. Mater. Chem. A*, **2017**, *6*(2).
- (S11) Yang, Z.; Zhao, Z.; Liang, K.; Zhou, X.; Shen, C. C.; Liu, Y. N. Synthesis of nanoporous structured iron carbide/Fe-N-carbon composites for efficient oxygen reduction reaction in Zn-air batteries. *J. Mater. Chem. A*, **2016**, *4*, 19037-19044.
- (S12) Liu, G.; Yao, R.; Zhao, Y.; Wang, M.; Li, N.; Li, Y. Encapsulation of Ni/Fe<sub>3</sub>O<sub>4</sub> heterostructures inside onion-like N-doped carbon nanorods enables synergistic electrocatalysis for water oxidation. *Nanoscale*, **2018**, *10*(8), 3997.
- (S13) Cheng, Y.; Guo, J.; Huang, Y.; Liao, Z.; Xiang, Z. Ultrastable hydrogen evolution electrocatalyst derived from phosphide postmodified metal-organic frameworks. *Nano Energy*, **2017**, *35*, 115-120.
- (S14) Zheng, Y.; Jiao, Y.; Zhu, Y.; Li, L. H.; Han, Y.; Chen, Y. Hydrogen evolution by a metal-free electrocatalyst. *Nat. Commun.*, **2014**, *5*, 3783.
- (S15) Deng, J.; Ren, P.; Deng, D.; Yu, L.; Yang, F.; Bao, X. Highly active and durable non-precious-metal catalysts encapsulated in carbon nanotubes for hydrogen evolution reaction. *Energy & Environ. Sci.*, **2014**, *7*, 1919-1923.
- (S16) Arumugam, M.; Ling, L.; Wang, C. Y.; Chen, C. W.; Chen, Y. Z.; Medina, H. Graphene-coated copper nanowire networks as a highly stable transparent electrode in harsh

---

environments toward efficiently electrocatalytic hydrogen evolution reaction. *J. Mater. Chem. A*, **2017**, *5*, 13320-13328.

(S17) Chen, Z.; Cummins, D.; Reinecke, B. N.; Clark, E.; Sunkara, M. K.; Jaramillo, T. F. Core-shell MoO<sub>3</sub>-MoS<sub>2</sub> nanowires for hydrogen evolution: a functional design for electrocatalytic materials. *Nano Letters*, **2011**, *11*(10), 4168-75.

(S18) Lu, W.; Song, Y.; Dou, M.; Ji, J.; Wang, F. Ni<sub>3</sub>S<sub>2</sub>@ MoO<sub>3</sub> core/shell arrays on Ni foam modified with ultrathin cds layer as a superior electrocatalyst for hydrogen evolution reaction. *Chem. Comm.*, **2017**, *54*(6).

(S19) Lang, L.; Shi, Y.; Wang, J.; Wang, F. B.; Xia, X. H. Hollow core-shell structured Ni-SN@C nanoparticles: a novel electrocatalyst for the hydrogen evolution reaction. *ACS Appl. Mater. Inter.*, **2015**, *7*(17), 9098-9102.

(S20) Yang, L.; Zhou, W.; Hou, D.; Zhou, K.; Li, G.; Tang, Z. Porous metallic moo - supported mos nanosheets for enhanced electrocatalytic activity in the hydrogen evolution reaction. *Nanoscale*, **2015**, *7*(12), 5203-5208.

(S21) Li, M.; Liu, T.; Bo, X.; Zhou, M.; Guo, L.; Guo, S. Hybrid carbon nanowire networks with Fe-P bond active site for efficient oxygen/hydrogen-based electrocatalysis. *Nano Energy*, **2017**, *33*, 221-228.
